# Supplementary material for: Comparative Transcriptome Analysis Reveals the Biocontrol Mechanism of Bacillus velezensis F21 Against Fusarium Wilt on Watermelon
Source: Front Microbiol. 2019 Apr 3;10:652. doi: 10.3389/fmicb.2019.00652 (PMC6456681; doi:10.3389/fmicb.2019.00652)
Supplement: Supplementary file 3 [file Table_3.xlsx]

## Sheet: Table S3
Table S3 Summary for the transcriptome assembly
Sample	Total Raw Reads (Mb)	Total Clean Reads (Mb)	Total Clean Bases (Gb)	Clean Reads Q20 (%)	Clean Reads Q30 (%)	Clean Reads Ratio (%)	Total Mappingc Ratio
Control_3 dpt	24.11	23.93	1.2	97.44	89.77	99.27	0.9547
B. velezensis F21_3 dpt	24.14	24.08	1.2	97.61	90.3	99.77	0.963
Control_5 dpt	24.1	24.05	1.2	97.32	89.39	99.77	0.9609
B. velezensis F21_5 dpt	24.1	23.98	1.2	97.49	89.94	99.47	0.9565
Control_8 dpt	24.1	24.05	1.2	97.4	89.53	99.76	0.9584
B. velezensis F21_8 dpt	24.11	24.05	1.2	97.28	89.29	99.78	0.9578
Control_11 dpt	24.14	24.11	1.21	98.17	90.86	99.91	0.9519
B. velezensis F21_11 dpt	24.14	24.01	1.2	97.53	89.98	99.48	0.9616
Control_13 dpt	24.1	24.05	1.2	97.47	89.82	99.78	0.965
B. velezensis F21_13 dpt	24.14	24.08	1.2	97.78	90.84	99.76	0.9664
Control_Fon_0 dpt	24.1	24	1.2	97.35	89.53	99.58	0.9602
B. velezensis F21_Fon_0 dpt	24.14	24.08	1.2	97.41	89.62	99.78	0.9615
Control_Fon_3 dpt	24.14	24.08	1.2	97.65	90.37	99.78	0.9574
B. velezensis F21_Fon_3 dpt	24.11	24.05	1.2	97.52	90	99.76	0.9562
Control_Fon_5 dpt	24.14	24.1	1.21	99.11	94.16	99.85	0.907
B. velezensis F21_Fon_5 dpt	24.1	24.05	1.2	97.56	90.08	99.76	0.9604
Control_Fon_8 dpt	24.11	24.04	1.2	97.6	90.19	99.74	0.9647
B. velezensis F21_Fon_8 dpt	24.11	24.04	1.2	97.72	90.6	99.73	0.9623
Note: Total Raw Reads(Mb): The reads amount before filtering, Unit: Mb Total Clean Reads(Mb): The reads amount after filtering, Unit: Mb Total Clean Bases(Gb): The total base amount after filtering, Unit: Gb
